# Supplementary material for: The zinc finger protein CLAMP promotes long-range chromatin interactions that mediate dosage compensation of the Drosophila male X-chromosome
Source: PubMed Central journal article supplement (PMC8240218; doi:10.1186/s13072-021-00399-3), 2021-06-29

# Jordan and Larschan Figure S1

**A**

Replicate 1

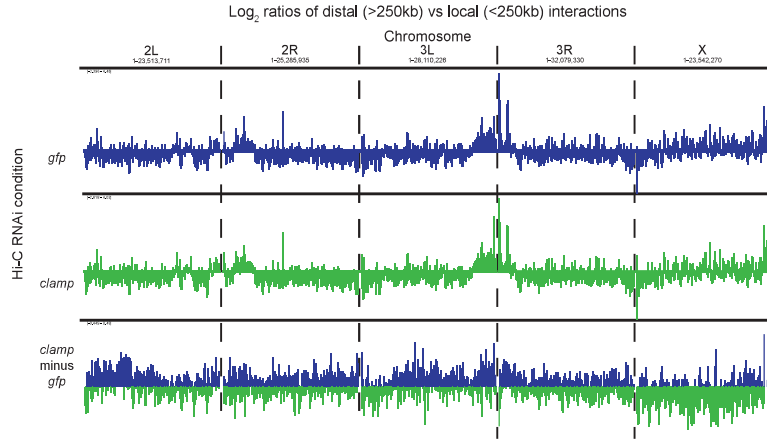

Replicate 2

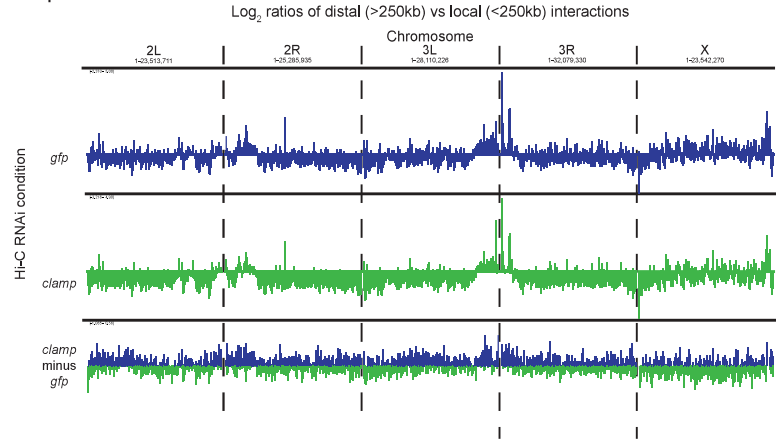**B**

Merged

Log<sub>2</sub> ratios of distal (>100kb) vs local (<100kb) interactions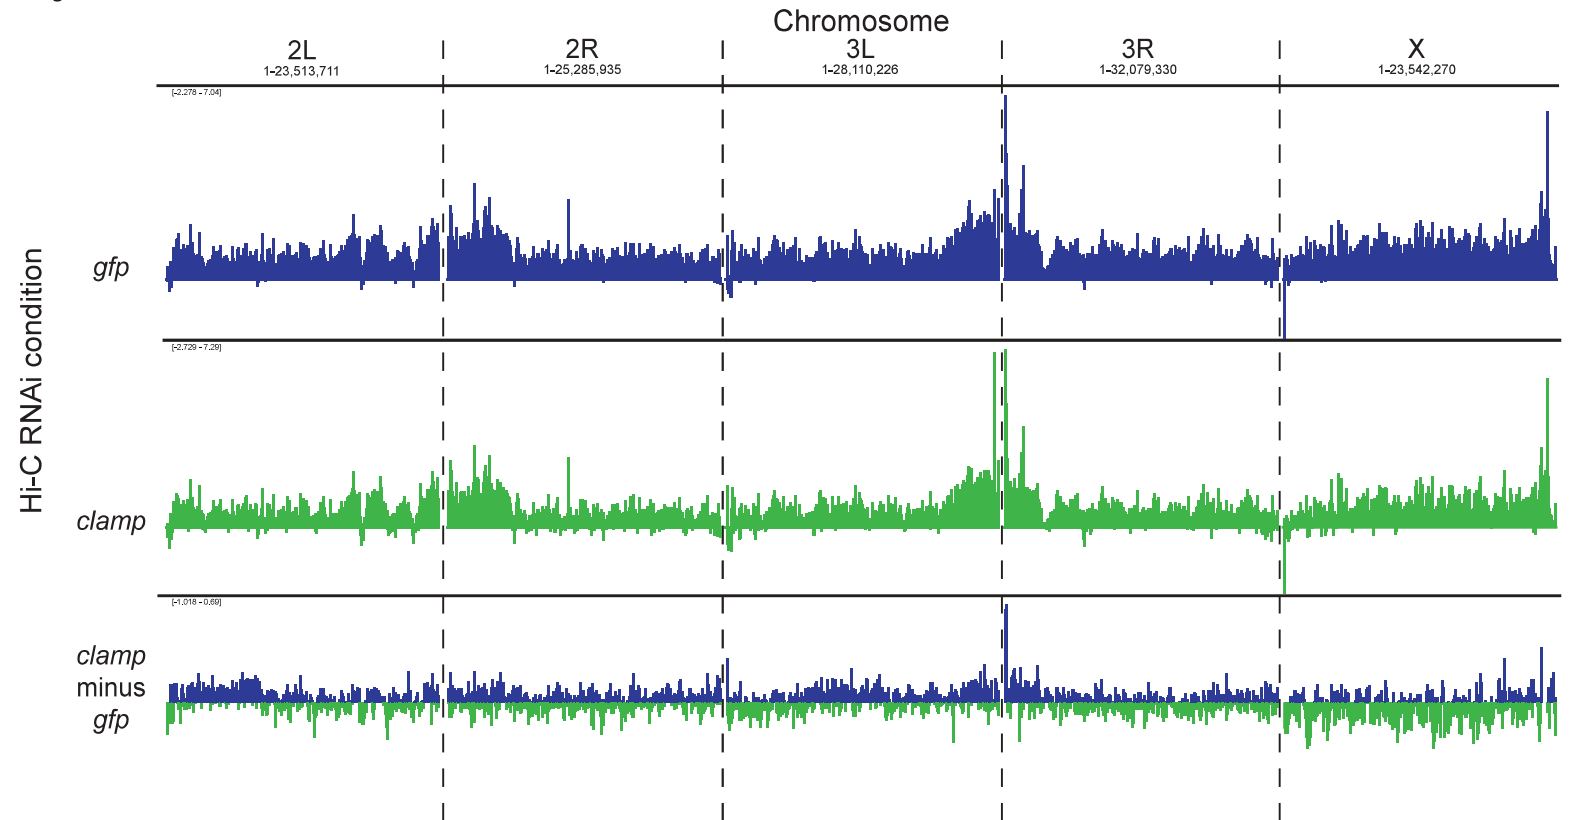

Replicate 1

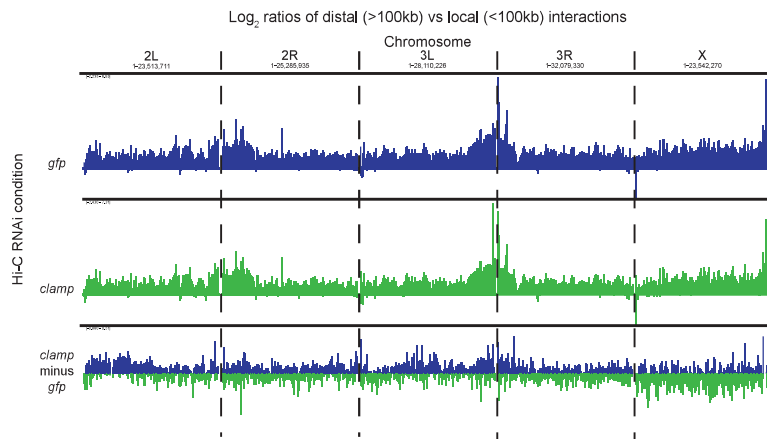

Replicate 2

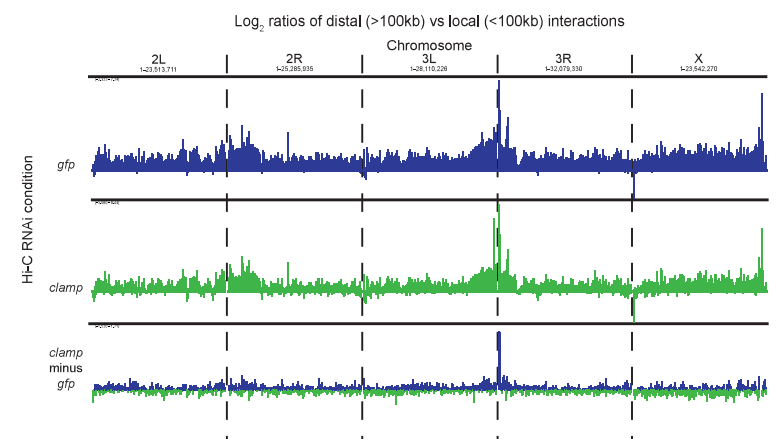

# Jordan and Larschan Figure S2

**A** CLAMP DI Counts per chromosome

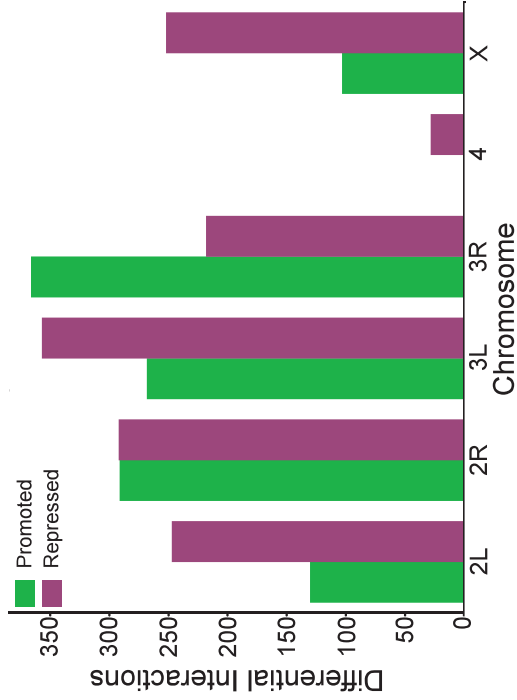

**B**  $\log_2$  ratio by interaction type

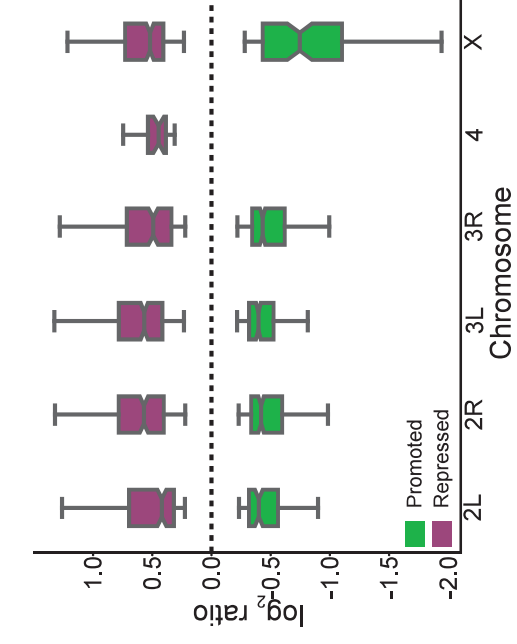

**C** Interaction distance

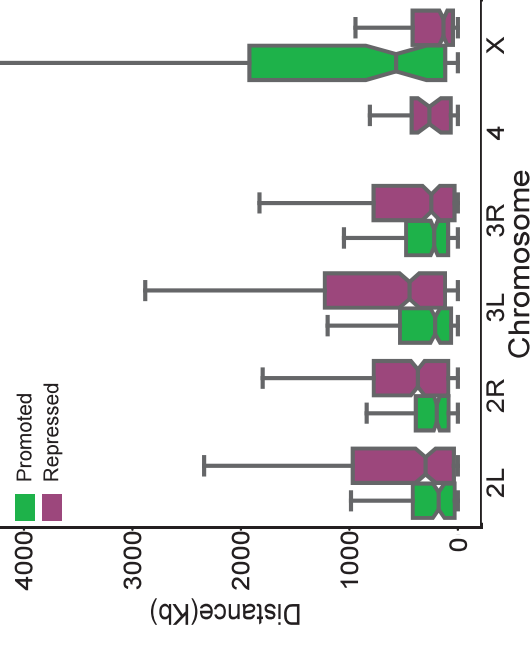

**D**

CLAMP-promoted DI

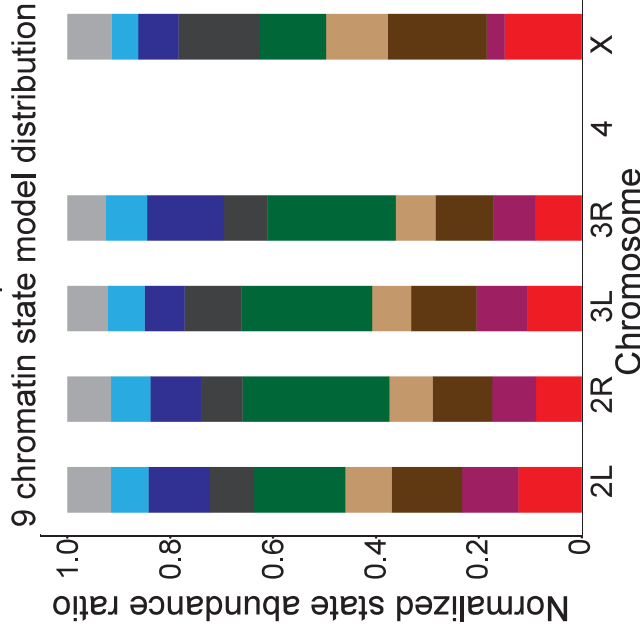

**E**

CLAMP-repressed DI

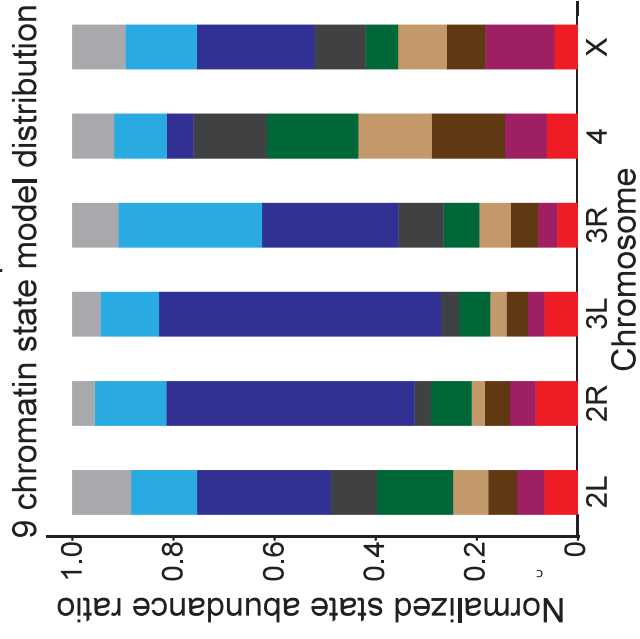

Active

Inactive

- State 1: Active promoters, TSS
- State 2: Transcriptional elongation
- State 3: Introns, active genes
- State 4: Active genes
- State 5: Dosage compensation

- State 6: Polycomb-mediated repression
- State 7: Pericentromeric heterochromatin
- State 8: Heterochromatin-like regions
- State 9: Silent domains

# Jordan and Larschan Figure S3

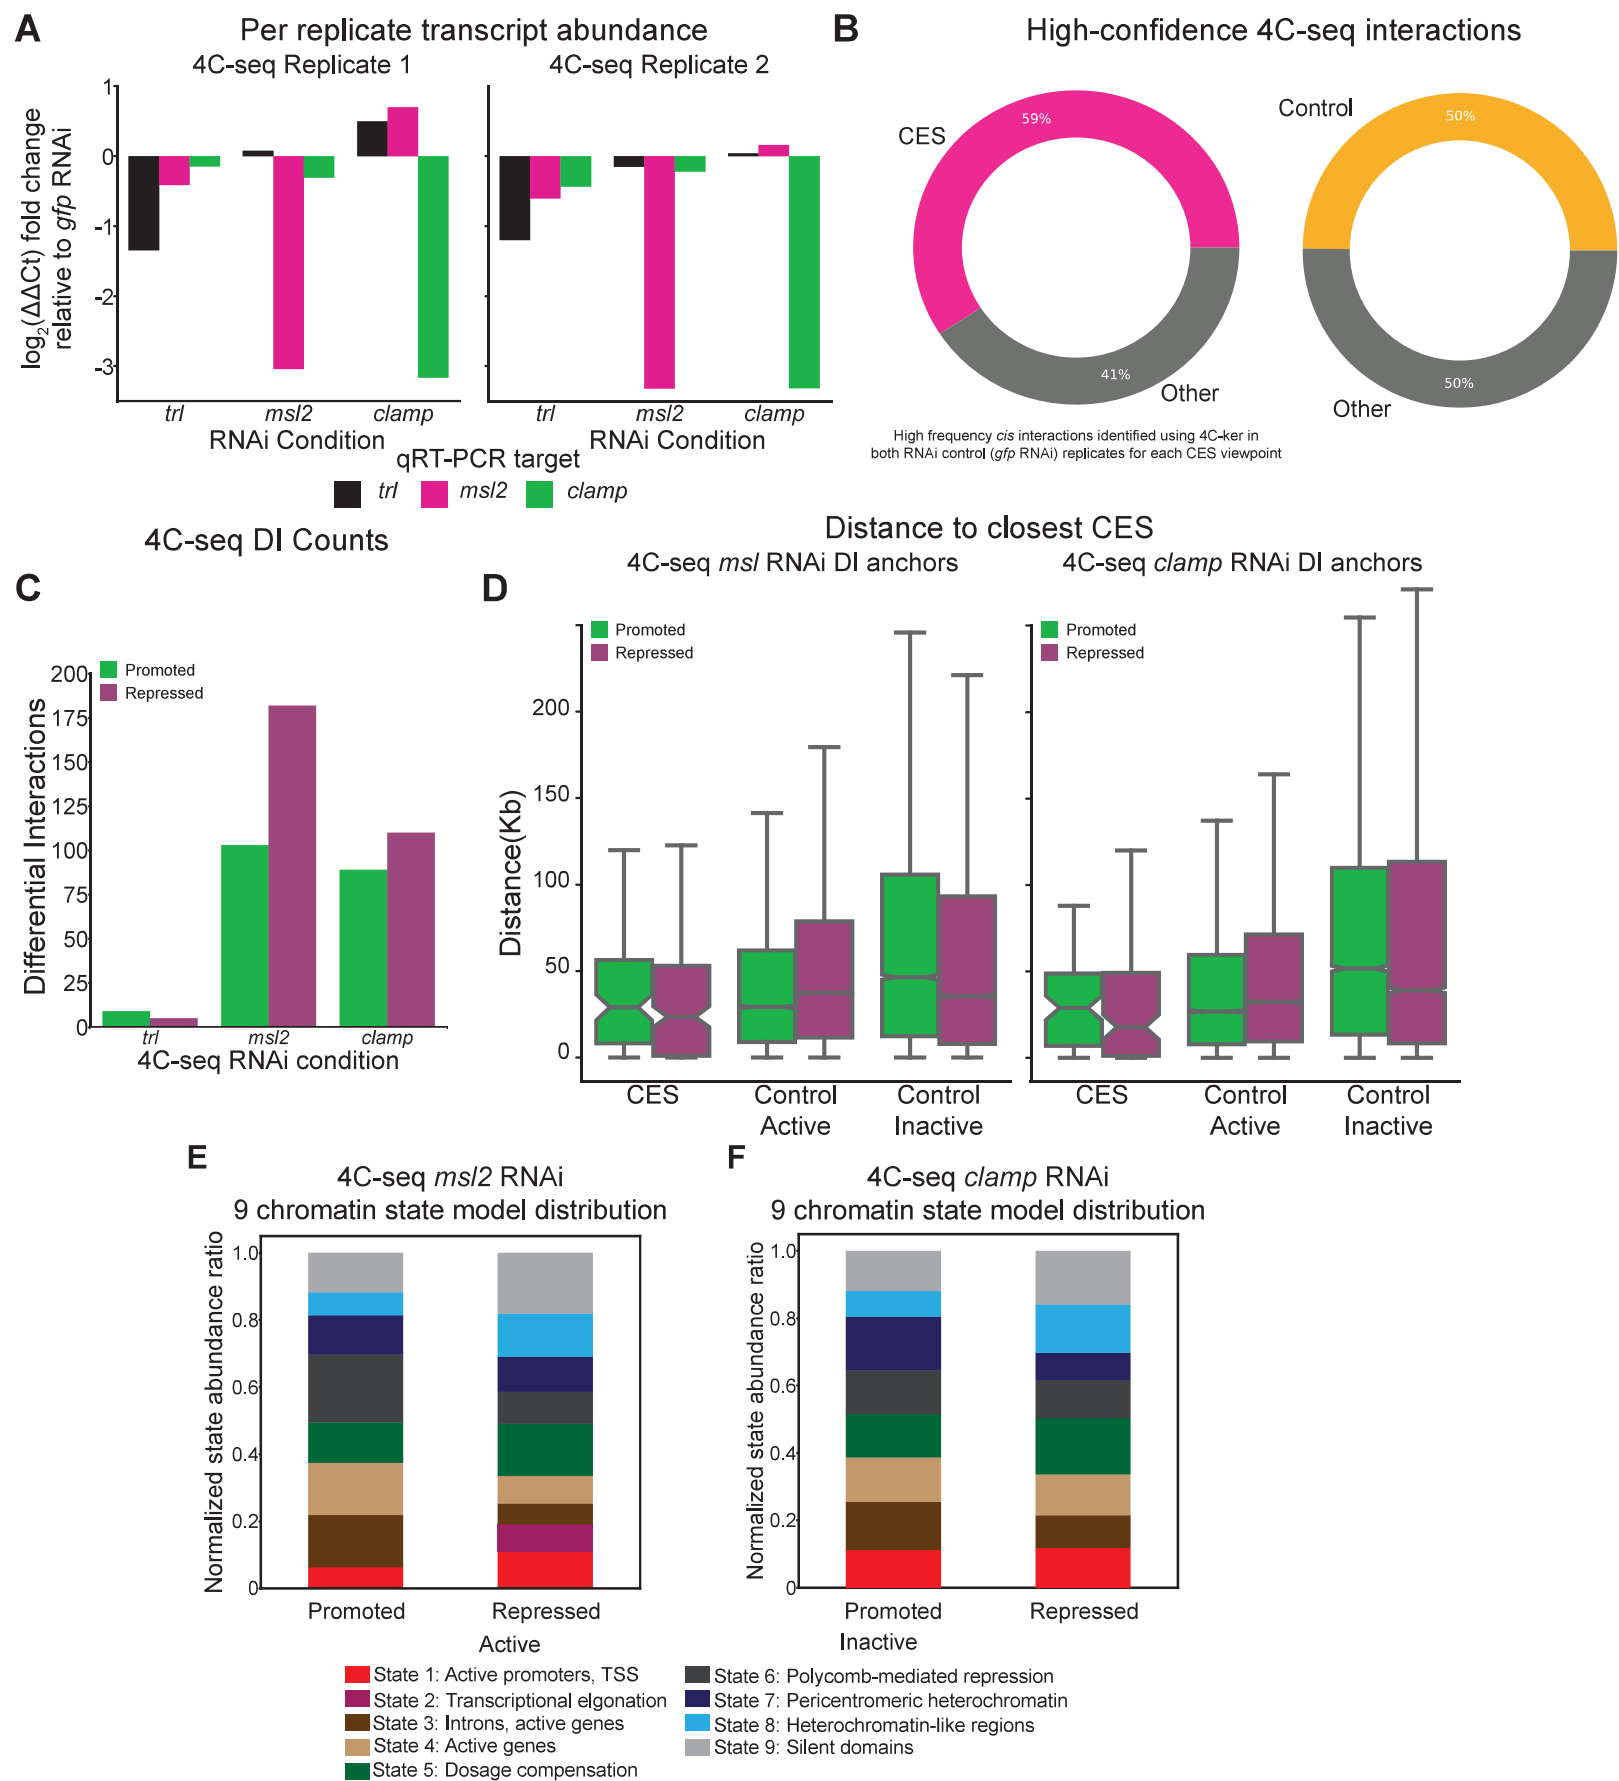

Supplement: 13072_2021_399_MOESM2_ESM.pdf [file 13072_2021_399_MOESM2_ESM.pdf]
